# Supplementary material for: Genomic imprinting of Xist by maternal H3K27me3
Source: PubMed Central journal article supplement — Genes Dev. 2017 Oct 1;31(19):1927–32. doi: 10.1101/gad.304113.117 (PMC5710138; doi:10.1101/gad.304113.117), 2017-10-01
Supplement: supp_31.19.1927_Supplemental_Materials.pdf [file supp_31.19.1927_Supplemental_Materials.pdf]

Inoue\_Supplemental Figure S1

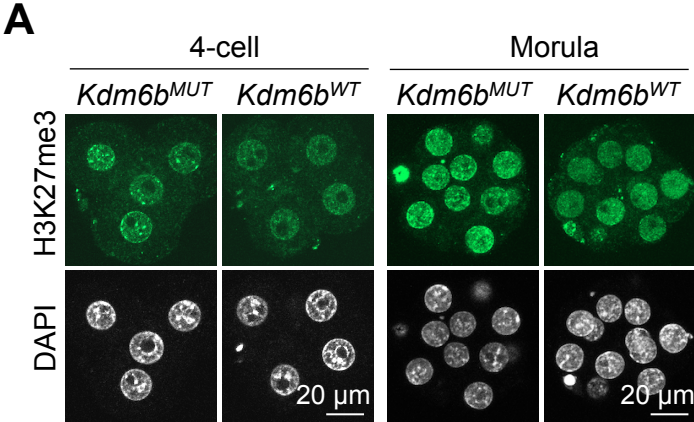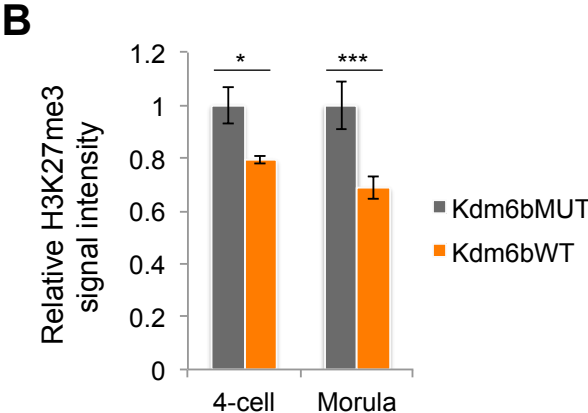

# Inoue\_Supplemental Figure S2

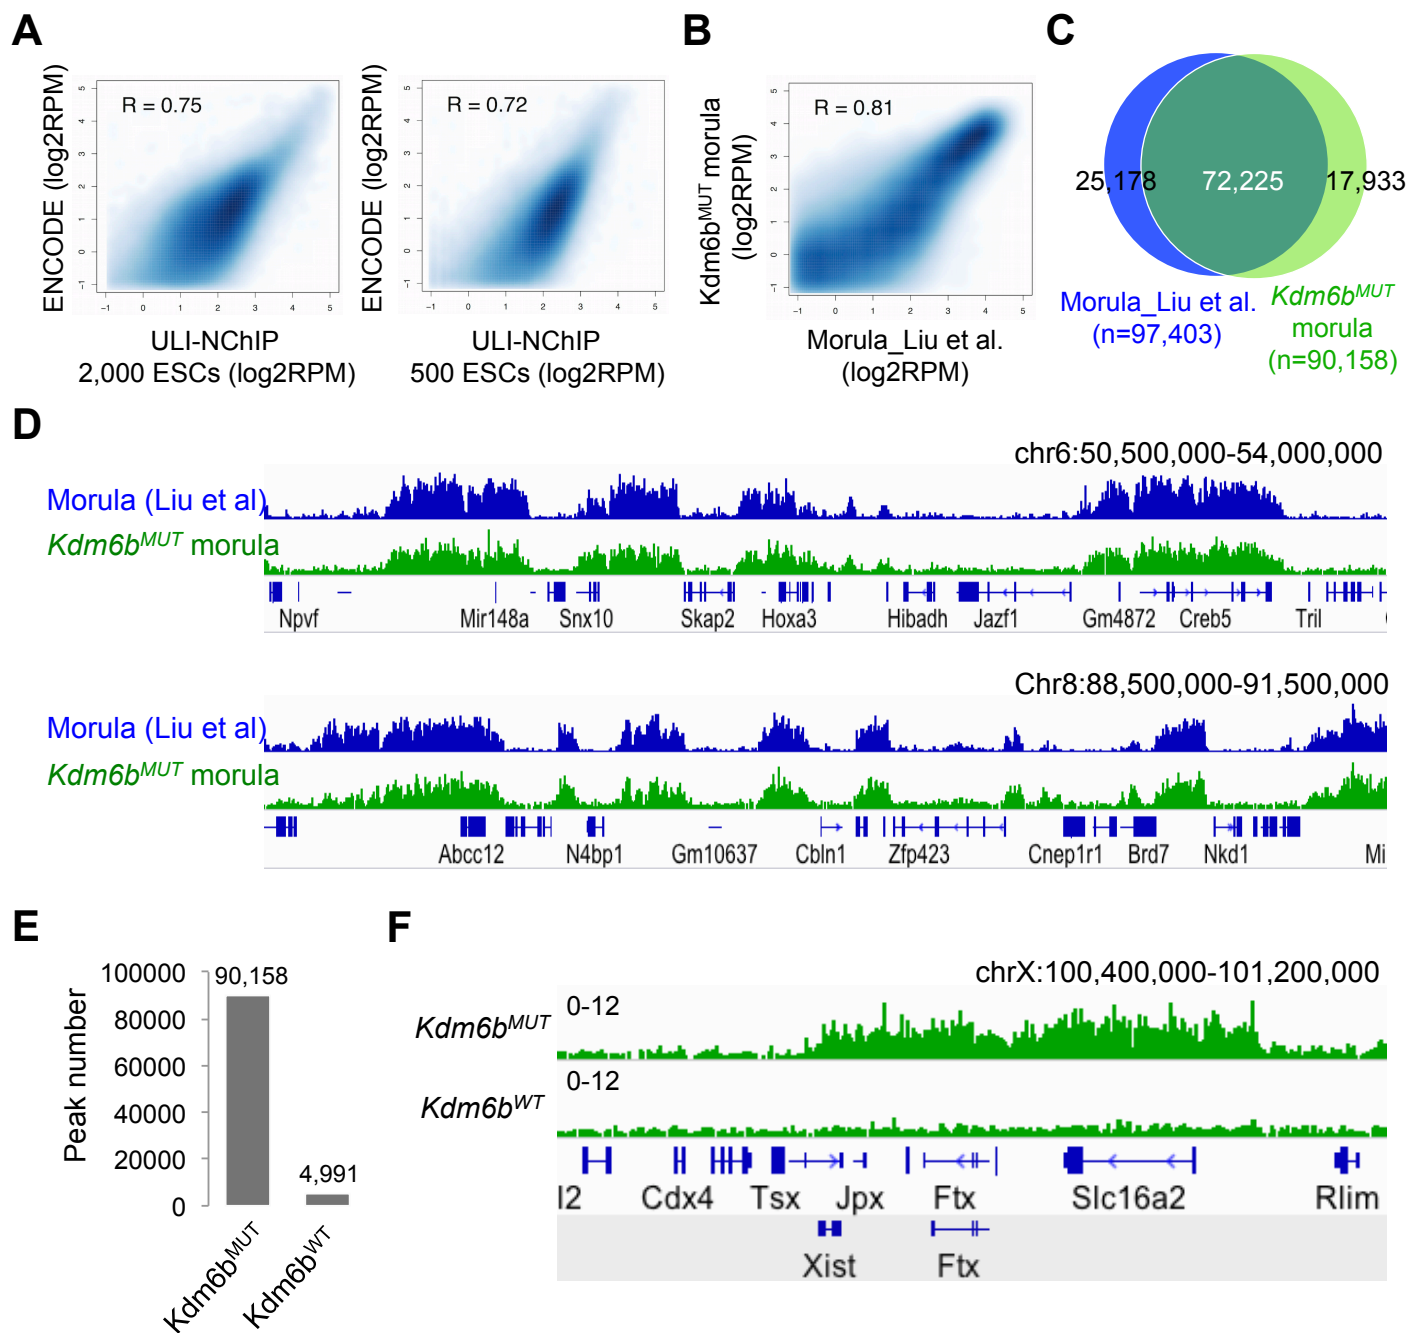

# Inoue\_Supplemental Figure S3

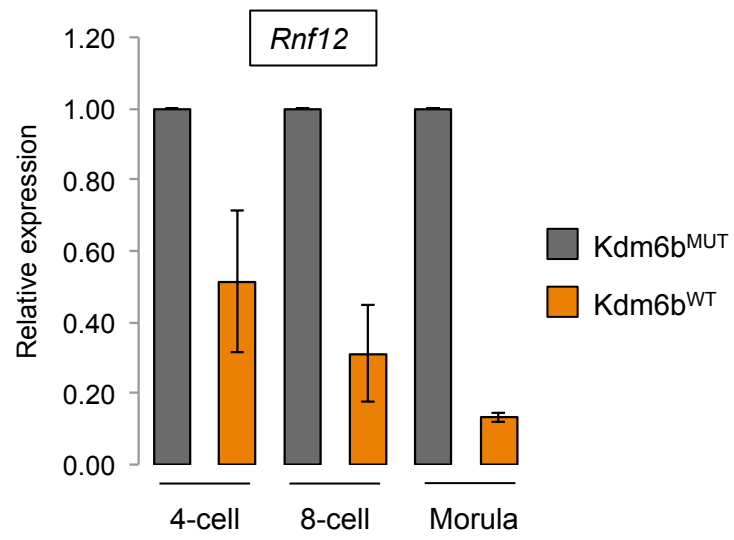

# Inoue\_Supplemental Figure S4

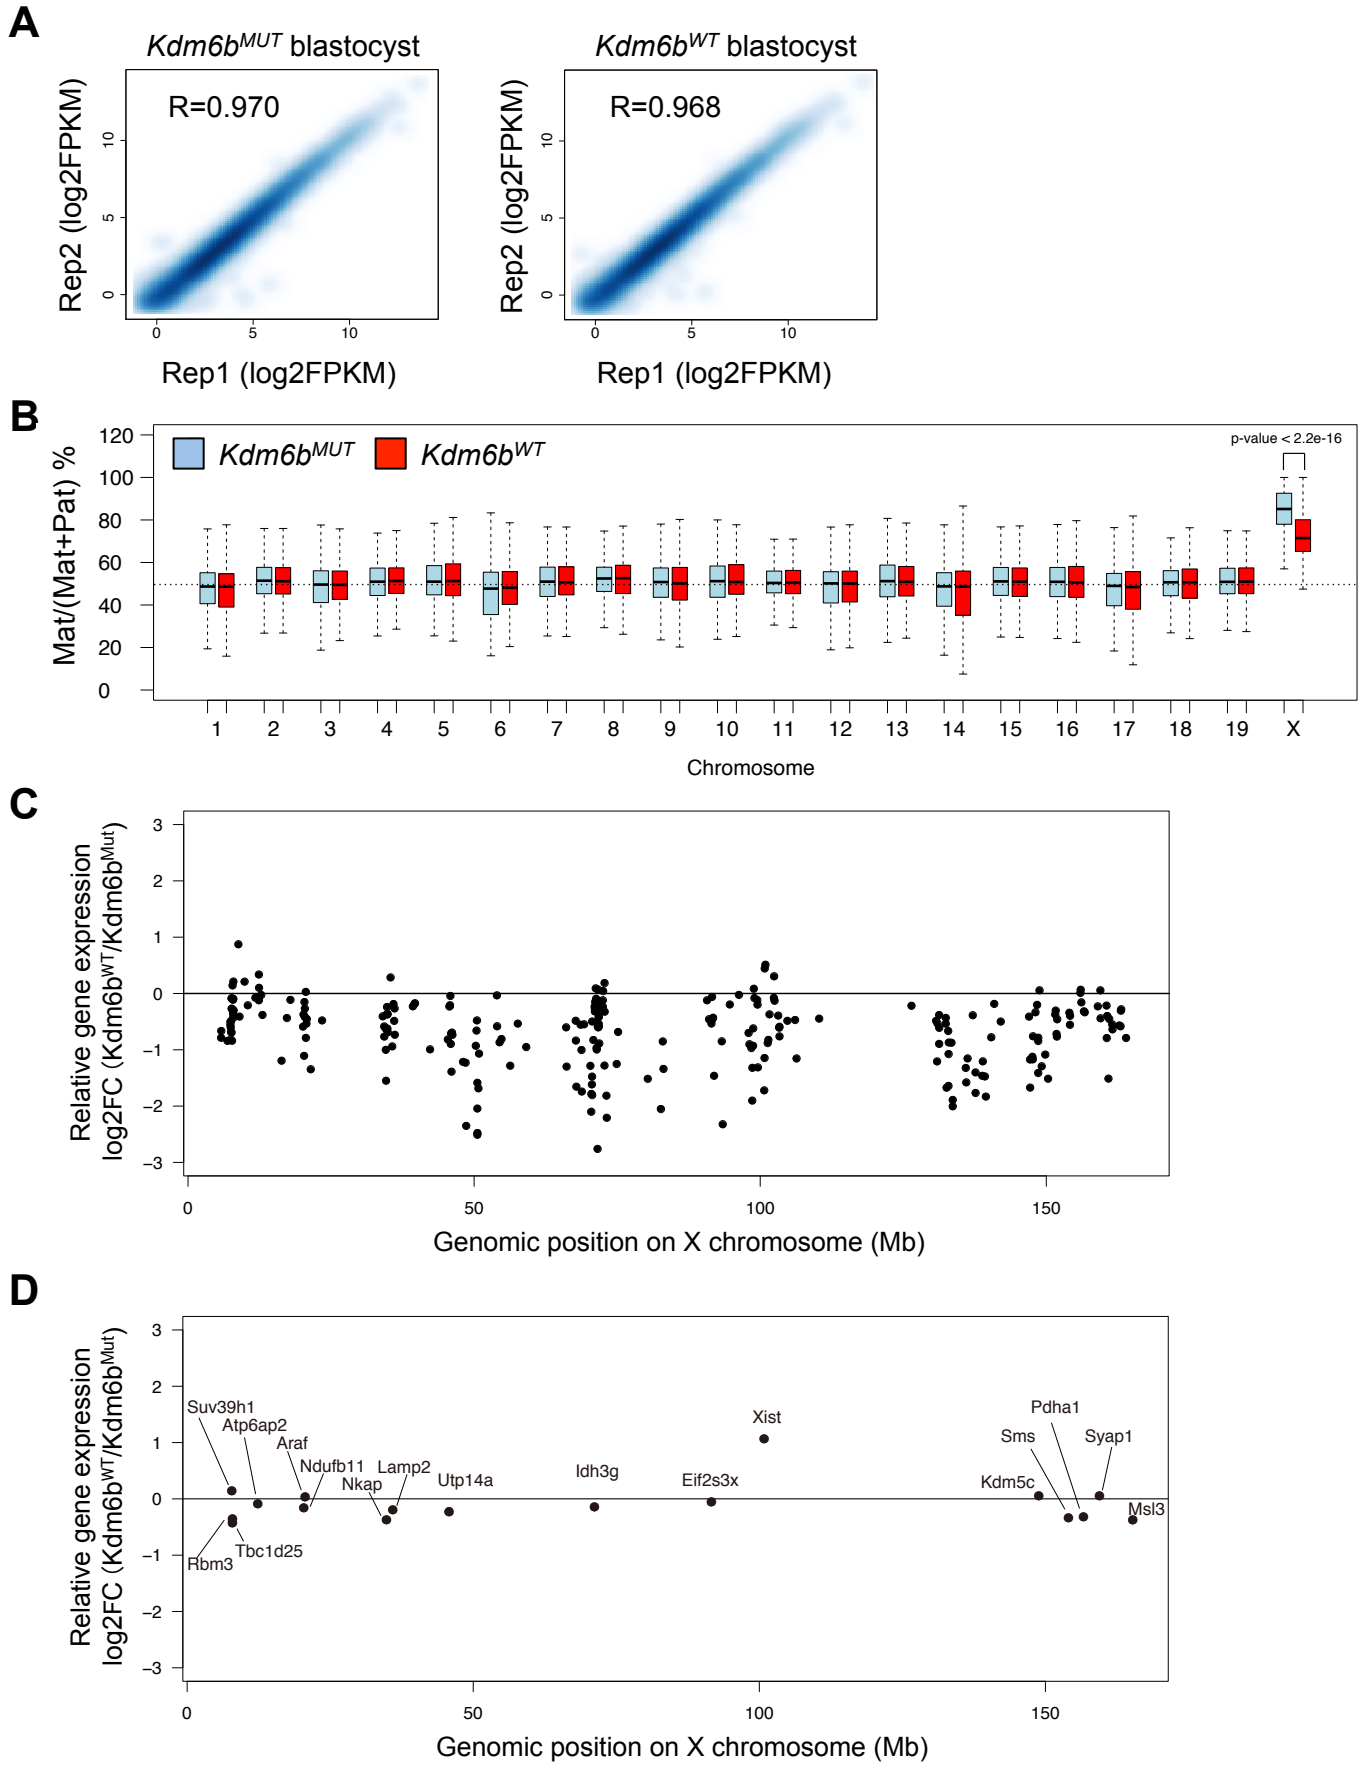

**SUPPLEMENTAL FIGURE LEGENDS****Figure S1. Ectopic *Kdm6b*<sup>WT</sup> mRNA injection results in reduction of H3K27me3 in preimplantation embryos, related to Figure 3**

- (A) Representative images of *Kdm6b*-injected 4-cell and morula embryos immunostained with H3K27me3 antibody. *Kdm6b* mRNA was injected into zygotes. The embryos were fixed at 46 (4-cell) and 78 (morula) hrs after fertilization.
- (B) Relative H3K27me3 signal intensity. The signal intensities of multiple blastomeres were measured and averaged to obtain the value of a single embryo. The average signals of *Kdm6b*<sup>MUT</sup> embryos were set as 1.0. The total numbers of embryos examined were 9 (*Kdm6b*<sup>MUT</sup>) and 9 (*Kdm6b*<sup>WT</sup>) for 4-cell and 19 (*Kdm6b*<sup>MUT</sup>) and 22 (*Kdm6b*<sup>WT</sup>) for morulae. Error bars indicate SE. \*\*\*,  $p < 0.001$ , \*  $p < 0.05$  (two-tailed Student t-test).

**Figure S2. Validation of H3K27me3 ULI-NChIP in embryonic stem cells (ESCs) and *Kdm6b*-injected morula embryos, related to Figure 3**

- (A) Scatterplot showing a correlation between H3K27me3 peaks detected in mouse ESCs in the ENCODE project and in our hands using 500 or 2,000 ESCs.
- (B, C) Scatterplot (B) and Venn diagram (C) showing a correlation between H3K27me3 peaks of a published dataset (Liu et al. 2016) and *Kdm6b*<sup>MUT</sup>-injected morula embryos.
- (D) Genome browser views of representative loci showing almost identical H3K27me3 enrichment in the public dataset and *Kdm6b*<sup>MUT</sup>-injected morula embryos.
- (E) The number of H3K27me3 peaks detected in *Kdm6b*<sup>MUT</sup>- and *Kdm6b*<sup>WT</sup>-injected morula embryos.
- (F) Genome browser view of the *Xist* locus showing loss of H3K27me3 domain in *Kdm6b*<sup>WT</sup>-injected embryos. The parental alleles were not distinguished in these tracks.

**Figure S3. RT-qPCR analysis of *Rnf12* in *Kdm6b*-injected embryos.** The data were normalized to *18S*, and then the values of *Kdm6b*<sup>MUT</sup> embryos were set as 1.0. Error bars indicate SE of three biological replicates. Each experiment used a pool of 18-24 embryos per group. Note that *Rnf12* is downregulated rather than upregulated in *Kdm6b*<sup>WT</sup>-injected embryos. We speculate that this is likely due to maternal XCI occurring as early as the 4-cell stage in *Kdm6b*<sup>WT</sup>-injected embryos, given that *Rnf12* is a non-escapee X-linked gene (Borensztein et al. 2017).

**Figure S4. Maternal X chromosome inactivation in *Kdm6b*<sup>WT</sup>-injected blastocyst embryos, related to Figure 4**

- (A) Scatter plot showing the correlation between biological duplicate of RNA-seq samples.
- (B) Box plot showing the maternal allelic expression ratios [Mat/(Mat+Pat)] of individual chromosomes in *Kdm6b*-injected blastocysts. Middle lines in the boxes represent the medians. Box edges and whiskers indicate the 25th/75th and 2.5th/ 97.5th percentiles, respectively.
- (C, D) The relative expression levels of X-linked genes between *Kdm6b*<sup>WT</sup>- and *Kdm6b*<sup>MUT</sup>-injected blastocyst embryos. The expression levels of the maternal allele were analyzed. Each dot represents an individual gene showing enough SNP reads (RPM>0.5). Panel D shows known escapees, and panel C shows the rest of genes.

## SUPPLEMENTAL TABLES

**Table S1.** Allelic gene expression in *Kdm6b*<sup>WT</sup>- and *Kdm6b*<sup>MUT</sup>-injected blastocyst embryos

**Table S2.** Summary of datasets generated in this study
